# Supplementary material
Source: PubMed Central journal article supplement (PMC6428682)
Supplement: NIHMS1007875-supplement-SUPPLEMENTAL_MATERIAL.pdf [file NIHMS1007875-supplement-SUPPLEMENTAL_MATERIAL.pdf]

SUPPLEMENTAL MATERIAL

Supplemental Table 1. Selected participant characteristics by non-hypertensive, controlled hypertension, and resistant hypertension (n = 784)

| Characteristics                                      | Non-Hypertensive (n=120) | Controlled Hypertension (n=248) | Uncontrolled Hypertension (n=320) | Resistant Hypertension (n=96) |
|------------------------------------------------------|--------------------------|---------------------------------|-----------------------------------|-------------------------------|
| Age (years), mean ± SD                               | 58.0 ± 10.1              | 64.9 ± 9.7                      | 62.6 ± 10.9                       | 66.9 ± 11.0                   |
| Male sex, N (%)                                      | 55 (45.8%)               | 67 (27.0%)                      | 106 (33.1%)                       | 32 (33.3%)                    |
| BMI (kg/m <sup>2</sup> )                             |                          |                                 |                                   |                               |
| mean ± SD                                            | 29.7 ± 6.5               | 32.5 ± 6.9                      | 32.0 ± 6.4                        | 32.8 ± 8.1                    |
| ≥ 30                                                 | 47 (39.2%)               | 143 (58.1%)                     | 186 (58.5%)                       | 58 (60.4%)                    |
| Respiratory event index 4% (events/hour)             |                          |                                 |                                   |                               |
| median ± IQR                                         | 3.1 ± 8.9                | 6.1 ± 11.3                      | 6.1 ± 11.5                        | 9.1 ± 19.2                    |
| ≥ 15                                                 | 16 (13.3%)               | 57 (23.0%)                      | 79 (24.7%)                        | 35 (36.5%)                    |
| Sleep apnea severity 4%, N (%)                       |                          |                                 |                                   |                               |
| None (REI4% < 5)                                     | 72 (60.0%)               | 103 (41.5%)                     | 141 (44.1%)                       | 26 (27.1%)                    |
| Mild (5 ≤ REI4% < 15)                                | 32 (26.7%)               | 89 (35.9%)                      | 103 (32.2%)                       | 37 (38.5%)                    |
| Moderate (15 ≤ REI4% < 30)                           | 10 (8.3%)                | 39 (15.7%)                      | 50 (15.6%)                        | 18 (18.7%)                    |
| Severe (REI4% ≥ 30)                                  | 6 (5.0%)                 | 17 (6.8%)                       | 26 (8.1%)                         | 15 (15.6%)                    |
| Respiratory event index 3% (events/hour)             |                          |                                 |                                   |                               |
| median ± IQR                                         | 5.7 ± 13.1               | 10.6 ± 14.4                     | 10.8 ± 15.5                       | 14.3 ± 19.7                   |
| ≥ 15                                                 | 33 (27.5%)               | 92 (37.1%)                      | 119 (37.2%)                       | 47 (49.0%)                    |
| Sleep apnea severity 3%, N (%)                       |                          |                                 |                                   |                               |
| None (REI3% < 5)                                     | 52 (43.3%)               | 52 (21.0%)                      | 74 (23.1%)                        | 18 (18.7%)                    |
| Mild (5 ≤ REI3% < 15)                                | 35 (29.2%)               | 105 (42.3%)                     | 130 (40.6%)                       | 33 (34.4%)                    |
| Moderate (15 ≤ REI3% < 30)                           | 22 (18.3%)               | 57 (23.0%)                      | 66 (20.6%)                        | 22 (22.9%)                    |
| Severe (REI3% ≥ 30)                                  | 11 (9.2%)                | 34 (13.7%)                      | 50 (15.6%)                        | 23 (24.0%)                    |
| Number of antihypertensive medications, median ± IQR | 0 ± 0                    | 2.0 ± 1.0                       | 1.0 ± 2.0                         | 3.0 ± 1.0                     |
| Mineralocorticoid receptor antagonist use, N (%)     | 0 (0%)                   | 14 (5.6%)                       | 0 (0%)                            | 9 (9.4%)                      |
| Systolic blood pressure (mmHg), mean ± SD            | 112.6 ± 9.6              | 114.1 ± 9.9                     | 136.5 ± 13.3                      | 137.7 ± 18.4                  |
| Diastolic blood pressure (mmHg), mean ± SD           | 69.4 ± 6.0               | 69.0 ± 7.4                      | 81.9 ± 9.5                        | 78.0 ± 12.1                   |

SD=standard deviation; REI= respiratory event index

Supplemental Table 2. Adjusted odds ratios (95% confidence intervals) of uncontrolled or resistant hypertension versus controlled hypertension associated with moderate or severe sleep apnea (REI3%)

|                                                      | Controlled (n=248) |                  | Uncontrolled (n = 320) |                  | Resistant (n = 96) |  |
|------------------------------------------------------|--------------------|------------------|------------------------|------------------|--------------------|--|
|                                                      | Reference          | OR (95% CI)      | P-value                | OR (95% CI)      | P-value            |  |
| <b>REI3*% <math>\geq</math> 15 vs. REI3% &lt; 15</b> |                    |                  |                        |                  |                    |  |
| Model 1                                              | 1.00               | 1.00 (0.71-1.41) | 0.98                   | 1.63 (1.01-2.62) | 0.05               |  |
| Model 2                                              | 1.00               | 1.02 (0.70-1.50) | 0.91                   | 1.53 (0.90-2.61) | 0.12               |  |
| Model 3                                              | 1.00               | 1.00 (0.67-1.49) | 1.00                   | 1.65 (0.93-2.91) | 0.09               |  |
| <b>Mild Sleep Apnea vs None (3%)</b>                 |                    |                  |                        |                  |                    |  |
| Model 1                                              | 1.00               | 0.87 (0.56-1.35) | 0.53                   | 0.91 (0.47-1.76) | 0.78               |  |
| Model 2                                              | 1.00               | 0.85 (0.53-1.37) | 0.51                   | 1.18 (0.57-2.47) | 0.66               |  |
| Model 3                                              | 1.00               | 0.88 (0.53-1.46) | 0.63                   | 1.07 (0.49-2.32) | 0.87               |  |
| <b>Moderate Sleep Apnea vs None (3%)</b>             |                    |                  |                        |                  |                    |  |
| Model 1                                              | 1.00               | 0.81 (0.49-1.34) | 0.42                   | 1.11 (0.54-2.31) | 0.77               |  |
| Model 2                                              | 1.00               | 0.80 (0.45-1.41) | 0.44                   | 1.33 (0.58-3.03) | 0.50               |  |
| Model 3                                              | 1.00               | 0.78 (0.43-1.41) | 0.41                   | 1.36 (0.57-3.22) | 0.49               |  |
| <b>Severe Sleep Apnea vs None (3%)</b>               |                    |                  |                        |                  |                    |  |
| Model 1                                              | 1.00               | 1.03 (0.59-1.81) | 0.91                   | 1.95 (0.92-4.15) | 0.08               |  |
| Model 2                                              | 1.00               | 1.00 (0.53-1.89) | 1.00                   | 2.03 (0.84-4.90) | 0.11               |  |
| Model 3                                              | 1.00               | 1.05 (0.54-2.05) | 0.89                   | 1.94 (0.76-4.96) | 0.16               |  |

\*3% oxygen desaturation; Percent time in hypoxemia was standardized to a mean of 0 and standard deviation of 1; sleep apnea severity categories: <5 (unaffected);  $\geq$ 5 to <15 (mild),  $\geq$ 15 to <30 (moderate), and  $\geq$ 30 (severe)

Model 1: Unadjusted

Model 2: Adjusted for age, sex, obese, education, smoking, and diabetes

Model 3: Adjusted for age, sex, obese, education, smoking, diabetes, depressive symptoms, perceived stress, sleep duration, and sleep efficiency

Supplemental Table 3. Adjusted odds ratios (95% confidence intervals) of uncontrolled or resistant hypertension versus controlled hypertension associated with continuous respiratory event index (REI4%), oxygen desaturation index (ODI4%), and obstructive apnea index (OAI0%)

|              | Controlled (n=248) | Uncontrolled (n = 320) |         | Resistant (n = 96) |         |
|--------------|--------------------|------------------------|---------|--------------------|---------|
|              | Reference          | OR (95% CI)            | P-value | OR (95% CI)        | P-value |
| <b>REI4%</b> |                    |                        |         |                    |         |
| Model 1      | 1.00               | 1.00 (0.99-1.02)       | 0.68    | 1.03 (1.01-1.04)   | < 0.01  |
| Model 2      | 1.00               | 1.00 (0.99-1.02)       | 0.64    | 1.02 (1.01-1.04)   | < 0.01  |
| Model 3      | 1.00               | 1.00 (0.99-1.02)       | 0.77    | 1.03 (1.01-1.05)   | < 0.01  |
| <b>ODI4%</b> |                    |                        |         |                    |         |
| Model 1      | 1.00               | 1.00 (0.99-1.02)       | 0.58    | 1.03 (1.01-1.04)   | < 0.01  |
| Model 2      | 1.00               | 1.00 (0.99-1.02)       | 0.58    | 1.03 (1.01-1.05)   | < 0.01  |
| Model 3      | 1.00               | 1.00 (0.99-1.02)       | 0.72    | 1.03 (1.01-1.05)   | < 0.01  |
| <b>OAI0%</b> |                    |                        |         |                    |         |
| Model 1      | 1.00               | 1.00 (0.98-1.03)       | 0.66    | 1.03 (1.01-1.06)   | < 0.01  |
| Model 2      | 1.00               | 1.00 (0.98-1.03)       | 0.73    | 1.03 (1.00-1.06)   | 0.02    |
| Model 3      | 1.00               | 1.01 (0.98-1.03)       | 0.62    | 1.03 (1.00-1.06)   | 0.03    |

Model 1: Unadjusted

Model 2: Adjusted for age, sex, obese, education, smoking, and diabetes

Model 3: Adjusted for age, sex, obese, education, smoking, diabetes, depressive symptoms, perceived stress, sleep duration, and sleep efficiency

Supplemental Table 4. Unadjusted odds ratios (95% confidence intervals) of uncontrolled or resistant hypertension vs. controlled with sleep apnea

| Variable                          | OR (95% CI)      | P-value |
|-----------------------------------|------------------|---------|
| REI4% $\geq$ 15 vs. REI4% < 15    | 1.26 (0.88-1.82) | 0.21    |
| Sleep Apnea (4%)                  |                  |         |
| Mild Sleep Apnea vs None (4%)     | 0.97 (0.58-1.39) | 0.87    |
| Moderate Sleep Apnea vs None (4%) | 1.07 (0.58-1.71) | 0.76    |
| Severe Sleep Apnea vs None (4%)   | 1.49 (0.80-2.75) | 0.21    |
| <i>p-trend</i>                    |                  | 0.30    |
| REI3% $\geq$ 15 vs. REI3% < 15    | 1.13 (0.81-1.56) | 0.47    |
| Sleep Apnea (3%)                  |                  |         |
| Mild Sleep Apnea vs None (3%)     | 0.88 (0.58-1.33) | 0.54    |
| Moderate Sleep Apnea vs None (3%) | 0.87 (0.54-1.40) | 0.57    |
| Severe Sleep Apnea vs None (3%)   | 1.21 (0.71-2.06) | 0.47    |
| <i>p-trend</i>                    |                  | 0.55    |
| Percent time in hypoxemia (1 SD)  | 1.12 (0.93-1.36) | 0.22    |

REI=respiratory event index; Percent time in hypoxemia was standardized to a mean of 0 and standard deviation of 1
